# Supplementary material for: Novel cationic tannin/glycosaminoglycan-based polyelectrolyte multilayers promote stem cells adhesion and proliferation
Source: Royal Society of Chemistry journal article supplement (doi:10.1039/c9ra03903a), 2019-01-01
Supplement: c9ra03903a1.pdf [file c9ra03903a1.pdf]

## Electronic Supplementary Information for

### Novel cationic tannin/glycosaminoglycan-based polyelectrolyte multilayers promote stem cells adhesion and proliferation

Paulo C. F. da Câmara,<sup>a,c\*</sup> Rosangela C. Balaban,<sup>a</sup> Mohammadhasan Hedayati,<sup>c</sup> Ketul C. Popat,<sup>d</sup> Alessandro F. Martins<sup>b,c\*</sup> and Matt J. Kipper<sup>c</sup>

Table S.1. PEMs atomic composition from survey spectra in percentage

| Envelopes | CS-TN10 | HEP-TN11 | HEP-TN10 |
|-----------|---------|----------|----------|
| C1s       | 64.5    | 63.4     | 67.0     |
| O1s       | 27.7    | 28.5     | 28.0     |
| N1s       | 4.0     | 4.7      | 4.0      |
| Na1s      | 2.8     | 2.2      | 0.1      |
| S2p       | 0.5     | 0.7      | 0.6      |
| Cl2p      | 0.1     | 0.3      | 0.1      |
| Si2p      | <0.1    | <0.1     | <0.1     |

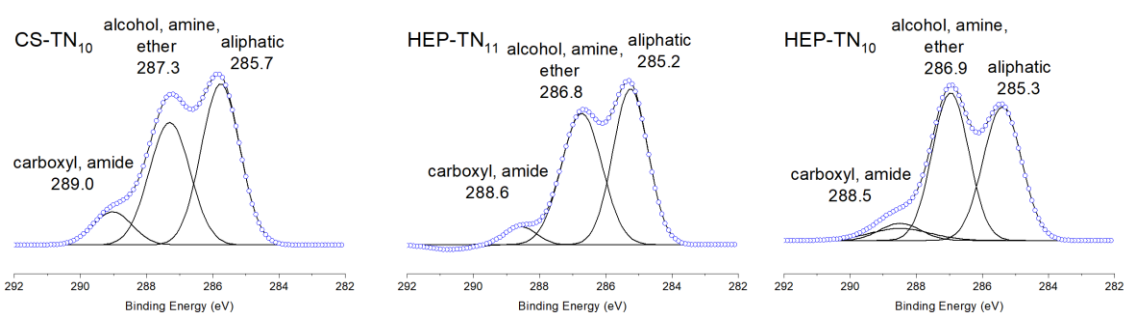

Figure S.1. High-resolution spectra of carbon (Supplementary material) exhibit four distinct states: aliphatic carbon (~284.8 eV); -C-OH, -C-NH<sub>2</sub>, -COC- (~287 eV); -NHCOCH<sub>3</sub> (~289 eV) and the carboxyl (~289 eV).
